# Supplementary material for: In Vivo Characterization of the Homing Endonuclease within the polB Gene in the Halophilic Archaeon Haloferax volcanii
Source: PubMed Central journal article supplement (PMC3024317; doi:10.1371/journal.pone.0015833), 2011-01-20
Supplement: pone.0015833.s001.pdf [file pone.0015833.s001.pdf]

## Figure S1:

Block A, Block B, Block C, Block D, Block E, Block H, Block F, Block G

Hvo polB DSVT**GDRPVVVRDP**GGTVRILPIEDLFARGTT-ESEVLIAADGDVVASATPGKTRRAL  
Hwa PolB-3 DSVT**GDRPVVVRDP**SDYIQIVPIKLLFEQATAPEQNMRLTADGAPSVNSELPKERRHL  
Ton-NAI Pol NS**ILPDEWVPL**LIDG-RLKLTRIGDFVDNAMD-EGNPLKSNETEVLVLEVLGIN-----  
Tzi Pol NS**ILPDEWIPL**LING-RLKLVRIIGDFVDSAMK-ELKPMKRDETEVLVLEVSGIG-----

Hvo polB DGWDALSVN-EDGEAEWQPIAQAIRH-NTDKPVVNLQHK**FGES**-TTTRDHSYVVPGED  
Hwa PolB-3 DQWEALSLS-DTGETEWQPINQIIRH-QTDKEILTLQHE**YGES**-TTTRDHSYITADDG  
Ton-NAI Pol ----AISFNKTKISEVRPVRALIRH-RYRGKVYSIKLSS**GRKIKVTEGHS**LFTVKNG  
Tzi Pol ----AISFNKTKRSETMPVRALLRH-RYSGKVYGIKLS**GRKIKVTAGHS**LFTFRDG

Hvo polB GLTTVSPDDVAE-----PYRVS-----GVPDVEPEVQV-----  
Hwa PolB-3 EYVETSPENVDE-----PLPIP-----NIASVKTIETI-----  
Ton-NAI Pol ELVEVTGGKVKPGDFIAVPRRINLPERHERINLADVLLNLPEEETADVVLTIPTKGR  
Tzi Pol ELVEIKGEEIKPGDFIAVPRINLPERQERINLVEVLLGLPEEETADVLTIPVKGR

Hvo polB -----DVYEVLRGYEREYEDGRSVGSDNSITKRK  
Hwa PolB-3 -----DIYQTL-TTDTQAQIGNDTEPKWLPSAD  
Ton-NAI Pol KNFFRGMLRTLRLWIFEGEKRPRTARRYLEHLQKL-GYVRLKKIGYEVLDKALRKYR  
Tzi Pol RNFFFKGMLRTLRLWIFGEEKRPGTARRYLEHLQTL-GYVRLGKIGYEVNEEALRDYR

Hvo polB QIHA-----DDEYVWFG---HEHHRDVDSTVKVKRFVDIDSE-----D  
Hwa PolB-3 CIHA-----NDEYVWIGTTDKQQDRD-DSTPAIPRYIDLTS-----T  
Ton-NAI Pol ALYEVLAEKVRYNGNKREYL---VAFNDLRD-----KIEFMPEEELREWKIGTLN  
Tzi Pol GLYETLTGKVKYNGNKREYL---VHFNDLRD-----IIRLMPEKELKWKVGTLN

Hvo polB G-----AALIR**LLGAYVPEGS**ASTGETAT--SKFGASLAESDREWLAQLQRD  
Hwa PolB-3 G-----HALIR**FLAVYLSDW**SKSTITTTE--RGQCLHITGPQESALKTCAAD  
Ton-NAI Pol GFRMEPFIEVNEDLAK**LLGYVSEGY**AGKQRNQKNGWSYSVKLYNNDQKVLDDMERL  
Tzi Pol GFRMETSIEVKEDFAK**LLSYYVSEGY**AGKQRSQKNGWNYSVKLYNNDQNVLDDMETL

Hvo polB YSRLFENTTAGIITSDRRAERTVEYQTDGTGGASVTYNDETLLQMMNELAAVFFREF  
Hwa PolB-3 ADQLFTHITPSIAVDAESNTNTV-----DSGFRCHIPTTLATTLISAF  
Ton-NAI Pol ASKFFGKV-----RRGKNYVE-----MPKKMAYVLFKSL  
Tzi Pol ASKFFGKV-----RRGKNYVE-----IPRKMAYVLFESL

Hvo polB AGQTSRGKRIPSFVHFLPEEKQDL**FLTLLV**-----**EGDGS**REFPRYTEAYAQRNFD  
Hwa PolB-3 AGHPAHT**KQIP**SIVYHLPAAEQSL**FIRHLI**QAESTP**ESDGV**SGRPQKSDKPILLENE  
Ton-NAI Pol CGTLAENKR**VPEVI**FTSPENVRWA**FLEGYF**-----**IGDG**-----DLHPSKRVR  
Tzi Pol CGTLAENKR**VPEI**IFTSPESVRWA**FLEGCF**-----**IGDG**-----DLHPGKGV

Hvo polB FE**TTSRELAAGLSMLLTQRGQ**KHSLKYRDSKDSYTIRTCTST-----YR-----  
Hwa PolB-3 FI**TTNRELAAGVSMMLTQCGQ**SYTISKQDTKGAYTIHINNS-----SS-----  
Ton-NAI Pol LS**TKSETLVNGLIILLNSLGI**S-AVKIRFESGVYRVLVNEELSFLGNSKKKNAYYSH  
Tzi Pol LS**TKSEELVNGLVILLNSLGV**S-ALRIWLDSGVYRVLVNEELPFLDKGKKKTPY---

Hvo polB -----EGRDPVLTEA---

|             |                                                           |
|-------------|-----------------------------------------------------------|
| Hwa PolB-3  | -----SGCTPTLTET--                                         |
| Ton-NA1 Pol | VIPKEILEDVFEKRFQKNVSPKKLREKIKRGELNQEKAKRISWLLEG-DIVLDRVEE |
| Tzi Pol     | VTSKEIPEEAFGKRFQRNISLEKLREKVEKGEPEAEKVKRVVWLLEG-DIVLDRVEE |
| Hvo polB    | ----DHDGYVYDLSVEENENFVDGVGGIVLHNT                         |
| Hwa PolB-3  | ----THSGYVYDLSVATNQNFVDGLGGLVLHNT                         |
| Ton-NA1 Pol | VEVEDYNGYVYDLSVEENENFLAGFGMIYAHNS                         |
| Tzi Pol     | VAVDDYEGYVYDLSVEENENFLAGFGMLYAHNS                         |
